# Supplementary material for: Litterfall and Accumulated Nutrients in Pinus taeda Plantation and Native Forest in Southern Brazil
Source: MDPI journal article supplement (doi:10.3390/f12121791), 2021-12-17
Supplement: s1 [file s1]

# Supplementary material

**Table S1.** Monthly dynamic of nutrients return to soil (kg ha<sup>-1</sup>) of *Pinus taeda* plantation and native forest in Southern Brazil.

| Nutrient | Fraction       | Forest             | Month |      |      |       |      |      |       |       |       |       |       |      |
|----------|----------------|--------------------|-------|------|------|-------|------|------|-------|-------|-------|-------|-------|------|
|          |                |                    | Jan   | Feb  | Mar  | Apr   | May  | Jun  | Jul   | Aug   | Sep   | Oct   | Nov   | Dec  |
| N        | Leaves/needles | <i>Pinus taeda</i> | 3.12* | 3.77 | 3.02 | 5.32  | 6.53 | 5.93 | 4.08  | 3.06  | 2.84  | 2.98  | 3.09  | 2.94 |
|          |                | Native Forest      | 5.04  | 6.79 | 6.03 | 10.47 | 6.41 | 6.80 | 10.11 | 17.64 | 15.45 | 9.97  | 10.02 | 6.77 |
|          | Twigs          | <i>Pinus taeda</i> | 0.08  | 0.22 | 0.09 | 0.11  | 0.04 | 0.06 | 0.10  | 0.13  | 0.22  | 0.24  | 0.18  | 0.14 |
|          |                | Native Forest      | 0.86  | 1.06 | 0.55 | 1.19  | 1.42 | 1.46 | 1.40  | 2.04  | 2.00  | 2.07  | 2.04  | 1.32 |
|          | Miscellaneous  | <i>Pinus taeda</i> | 0.12  | 0.10 | 0.14 | 0.12  | 0.19 | 0.22 | 0.15  | 0.18  | 0.42  | 0.17  | 0.23  | 0.20 |
|          |                | Native Forest      | 1.11  | 0.91 | 0.56 | 0.75  | 0.72 | 0.82 | 1.59  | 2.43  | 2.29  | 2.39  | 2.91  | 1.79 |
| P        | Leaves/needles | <i>Pinus taeda</i> | 0.18  | 0.20 | 0.16 | 0.25  | 0.28 | 0.69 | 0.18  | 0.18  | 0.16  | 0.18  | 0.18  | 0.15 |
|          |                | Native Forest      | 0.73  | 1.05 | 0.95 | 1.67  | 0.78 | 1.35 | 1.71  | 3.66  | 2.91  | 1.59  | 1.78  | 0.92 |
|          | Twigs          | <i>Pinus taeda</i> | 0.00  | 0.01 | 0.01 | 0.00  | 0.00 | 0.00 | 0.00  | 0.01  | 0.01  | 0.01  | 0.01  | 0.01 |
|          |                | Native Forest      | 0.12  | 0.11 | 0.06 | 0.17  | 0.16 | 0.18 | 0.16  | 0.22  | 0.23  | 0.23  | 0.24  | 0.15 |
|          | Miscellaneous  | <i>Pinus taeda</i> | 0.01  | 0.00 | 0.01 | 0.01  | 0.01 | 0.01 | 0.02  | 0.02  | 0.03  | 0.01  | 0.01  | 0.01 |
|          |                | Native Forest      | 0.10  | 0.12 | 0.07 | 0.08  | 0.07 | 0.10 | 0.20  | 0.32  | 0.28  | 0.29  | 0.36  | 0.27 |
| K        | Leaves/needles | <i>Pinus taeda</i> | 0.94  | 1.09 | 0.90 | 1.70  | 1.76 | 2.29 | 1.00  | 0.79  | 0.61  | 0.66  | 0.66  | 0.92 |
|          |                | Native Forest      | 1.67  | 1.76 | 2.11 | 2.93  | 1.23 | 3.95 | 3.68  | 10.25 | 6.78  | 2.90  | 3.75  | 2.09 |
|          | Twigs          | <i>Pinus taeda</i> | 0.02  | 0.02 | 0.01 | 0.01  | 0.00 | 0.01 | 0.02  | 0.02  | 0.04  | 0.03  | 0.03  | 0.02 |
|          |                | Native Forest      | 0.22  | 0.22 | 0.13 | 0.27  | 0.25 | 0.36 | 0.32  | 0.42  | 0.51  | 0.39  | 0.42  | 0.35 |
|          | Miscellaneous  | <i>Pinus taeda</i> | 0.03  | 0.02 | 0.04 | 0.02  | 0.03 | 0.04 | 0.03  | 0.06  | 0.06  | 0.02  | 0.03  | 0.03 |
|          |                | Native Forest      | 0.16  | 0.18 | 0.16 | 0.14  | 0.13 | 0.27 | 0.41  | 0.90  | 0.65  | 0.64  | 0.82  | 0.37 |
| Ca       | Leaves/needles | <i>Pinus taeda</i> | 1.82  | 2.16 | 1.65 | 3.74  | 4.66 | 4.43 | 3.15  | 2.09  | 1.59  | 1.70  | 1.48  | 1.51 |
|          |                | Native Forest      | 5.81  | 8.30 | 8.17 | 13.85 | 8.13 | 9.45 | 14.77 | 27.74 | 23.85 | 13.38 | 12.18 | 7.64 |
|          | Twigs          | <i>Pinus taeda</i> | 0.05  | 0.13 | 0.04 | 0.05  | 0.03 | 0.04 | 0.08  | 0.08  | 0.13  | 0.17  | 0.08  | 0.07 |
|          |                | Native Forest      | 1.18  | 1.01 | 0.73 | 1.63  | 2.19 | 2.35 | 2.10  | 3.48  | 3.03  | 3.15  | 3.11  | 1.89 |
|          | Miscellaneous  | <i>Pinus taeda</i> | 0.06  | 0.05 | 0.06 | 0.04  | 0.08 | 0.08 | 0.05  | 0.05  | 0.11  | 0.07  | 0.09  | 0.08 |
|          |                | Native Forest      | 0.96  | 0.80 | 0.53 | 0.73  | 0.82 | 0.65 | 1.11  | 2.41  | 1.58  | 1.76  | 2.50  | 1.66 |
| Mg       | Leaves/needles | <i>Pinus taeda</i> | 0.53  | 0.86 | 0.58 | 1.10  | 1.17 | 1.41 | 0.74  | 0.57  | 0.46  | 0.47  | 0.43  | 0.44 |
|          |                | Native Forest      | 1.52  | 2.30 | 1.92 | 2.91  | 1.47 | 2.20 | 2.55  | 4.72  | 4.01  | 2.36  | 2.67  | 1.83 |
|          | Twigs          | <i>Pinus taeda</i> | 0.01  | 0.02 | 0.01 | 0.02  | 0.00 | 0.01 | 0.01  | 0.02  | 0.03  | 0.03  | 0.02  | 0.01 |
|          |                | Native Forest      | 0.15  | 0.15 | 0.08 | 0.18  | 0.21 | 0.29 | 0.22  | 0.31  | 0.36  | 0.35  | 0.34  | 0.21 |
|          | Miscellaneous  | <i>Pinus taeda</i> | 0.01  | 0.01 | 0.01 | 0.01  | 0.02 | 0.02 | 0.02  | 0.02  | 0.04  | 0.02  | 0.02  | 0.02 |
|          |                | Native Forest      | 0.14  | 0.14 | 0.07 | 0.11  | 0.09 | 0.10 | 0.18  | 0.33  | 0.32  | 0.32  | 0.38  | 0.27 |

\*The values are presented as mean (n = 4).

**Table S2.** Monthly dynamic of nutrient concentration (g kg<sup>-1</sup>) in litterfall fractions of *Pinus taeda* plantation and native forest in Southern Brazil.

| Nutrient | Fraction       | Forest             | Month |       |       |       |       |       |       |       |       |       |       |       |
|----------|----------------|--------------------|-------|-------|-------|-------|-------|-------|-------|-------|-------|-------|-------|-------|
|          |                |                    | Jan   | Feb   | Mar   | Apr   | May   | Jun   | Jul   | Aug   | Sep   | Oct   | Nov   | Dec   |
| N        | Leaves/needles | <i>Pinus taeda</i> | 7.84* | 7.65  | 7.13  | 6.70  | 6.08  | 5.52  | 6.41  | 7.39  | 8.74  | 9.36  | 10.09 | 9.19  |
|          |                | Native Forest      | 20.46 | 20.16 | 18.55 | 19.34 | 21.44 | 19.16 | 19.23 | 17.95 | 18.37 | 19.41 | 19.93 | 21.37 |
|          | Twigs          | <i>Pinus taeda</i> | 4.68  | 6.06  | 4.59  | 7.17  | 5.66  | 4.42  | 6.25  | 7.02  | 5.59  | 6.90  | 7.94  | 7.57  |
|          |                | Native Forest      | 14.31 | 17.05 | 15.08 | 15.13 | 15.07 | 14.68 | 13.68 | 14.78 | 14.61 | 14.86 | 14.76 | 15.45 |
|          | Miscellaneous  | <i>Pinus taeda</i> | 5.78  | 5.27  | 6.39  | 11.49 | 10.70 | 12.94 | 12.01 | 8.28  | 9.15  | 7.01  | 8.16  | 8.12  |
|          |                | Native Forest      | 21.77 | 20.98 | 21.74 | 20.65 | 21.08 | 20.81 | 23.56 | 21.30 | 22.26 | 23.28 | 21.31 | 23.31 |
| P        | Leaves/needles | <i>Pinus taeda</i> | 0.45  | 0.40  | 0.39  | 0.31  | 0.27  | 0.54  | 0.29  | 0.41  | 0.51  | 0.57  | 0.59  | 0.48  |
|          |                | Native Forest      | 2.96  | 3.11  | 3.08  | 3.00  | 2.70  | 3.54  | 3.26  | 3.73  | 3.33  | 3.27  | 3.47  | 2.84  |
|          | Twigs          | <i>Pinus taeda</i> | 0.20  | 0.23  | 0.47  | 0.28  | 0.22  | 0.27  | 0.27  | 0.31  | 0.32  | 0.42  | 0.44  | 0.32  |
|          |                | Native Forest      | 1.98  | 1.88  | 1.74  | 2.04  | 1.69  | 1.74  | 1.66  | 1.55  | 1.69  | 1.67  | 1.85  | 1.87  |
|          | Miscellaneous  | <i>Pinus taeda</i> | 0.27  | 0.24  | 0.25  | 0.68  | 0.56  | 0.89  | 0.87  | 0.81  | 1.06  | 0.39  | 0.42  | 0.36  |
|          |                | Native Forest      | 2.13  | 2.23  | 2.61  | 2.18  | 2.04  | 2.52  | 2.86  | 2.73  | 2.69  | 2.59  | 2.82  | 2.34  |
| K        | Leaves/needles | <i>Pinus taeda</i> | 2.33  | 2.12  | 2.18  | 2.03  | 1.68  | 1.86  | 1.63  | 1.71  | 1.93  | 2.02  | 2.28  | 2.55  |
|          |                | Native Forest      | 6.72  | 5.17  | 7.70  | 5.25  | 4.39  | 9.25  | 6.51  | 10.53 | 7.36  | 6.06  | 7.17  | 6.49  |
|          | Twigs          | <i>Pinus taeda</i> | 0.77  | 0.51  | 0.57  | 0.79  | 0.45  | 0.54  | 1.24  | 1.13  | 1.22  | 0.85  | 1.21  | 1.06  |
|          |                | Native Forest      | 3.90  | 3.68  | 4.16  | 3.97  | 3.01  | 3.79  | 3.66  | 4.28  | 3.59  | 3.06  | 3.78  | 4.72  |
|          | Miscellaneous  | <i>Pinus taeda</i> | 1.52  | 0.89  | 1.63  | 1.68  | 1.68  | 2.53  | 2.03  | 3.14  | 1.88  | 0.97  | 1.11  | 1.25  |
|          |                | Native Forest      | 4.56  | 4.16  | 6.19  | 3.89  | 4.08  | 6.69  | 5.72  | 7.69  | 6.09  | 5.28  | 6.87  | 5.23  |
| Ca       | Leaves/needles | <i>Pinus taeda</i> | 4.43  | 4.30  | 3.90  | 4.46  | 4.37  | 4.25  | 4.90  | 4.94  | 5.01  | 5.22  | 4.76  | 4.63  |
|          |                | Native Forest      | 22.60 | 24.24 | 26.29 | 24.23 | 26.72 | 26.04 | 28.18 | 28.12 | 27.79 | 25.83 | 23.92 | 23.37 |
|          | Twigs          | <i>Pinus taeda</i> | 2.90  | 3.49  | 2.40  | 3.60  | 4.50  | 3.60  | 4.22  | 3.51  | 3.66  | 4.20  | 3.55  | 3.67  |
|          |                | Native Forest      | 19.94 | 17.53 | 18.35 | 19.49 | 22.63 | 21.17 | 21.63 | 23.28 | 22.52 | 21.92 | 21.25 | 22.03 |
|          | Miscellaneous  | <i>Pinus taeda</i> | 3.03  | 2.35  | 2.83  | 4.69  | 4.40  | 5.35  | 4.19  | 2.51  | 3.18  | 3.01  | 3.15  | 3.29  |
|          |                | Native Forest      | 22.03 | 17.59 | 21.51 | 19.10 | 24.23 | 17.74 | 18.38 | 19.22 | 15.89 | 17.08 | 19.91 | 20.02 |
| Mg       | Leaves/needles | <i>Pinus taeda</i> | 1.28  | 1.58  | 1.40  | 1.40  | 1.08  | 1.20  | 1.15  | 1.34  | 1.47  | 1.48  | 1.43  | 1.33  |
|          |                | Native Forest      | 6.02  | 6.64  | 6.13  | 4.97  | 4.87  | 5.48  | 4.86  | 4.79  | 4.79  | 4.70  | 5.23  | 5.73  |
|          | Twigs          | <i>Pinus taeda</i> | 0.51  | 0.65  | 0.55  | 1.05  | 0.68  | 0.70  | 0.86  | 0.83  | 0.87  | 0.90  | 0.80  | 0.82  |
|          |                | Native Forest      | 2.49  | 2.57  | 2.25  | 2.39  | 2.41  | 2.41  | 2.26  | 2.29  | 2.61  | 2.57  | 2.56  | 2.54  |
|          | Miscellaneous  | <i>Pinus taeda</i> | 0.75  | 0.61  | 0.54  | 1.20  | 1.10  | 1.22  | 1.17  | 0.94  | 0.98  | 0.87  | 0.83  | 0.89  |
|          |                | Native Forest      | 2.96  | 2.93  | 2.87  | 2.86  | 2.74  | 2.64  | 2.83  | 2.87  | 3.07  | 3.01  | 2.94  | 2.97  |

\*The values are presented as mean (n = 4).
